# Supplementary material
Source: HighWire-hosted journal article supplement (https://jnm.snmjournals.org/highwire/filestream/102443/field_highwire_adjunct_files/0/254243_Supplemental_Data.pdf)
Supplement: 254243_Supplemental_Data.pdf [file 254243_Supplemental_Data.pdf]

**Supplemental Table 1:** Diagnostic performance of absolute values of <sup>18</sup>F-FET PET parameters for predicting a PFS of 9 months or more

|                                 | <b>TBR<sub>mean</sub> at baseline</b> | <b>TBR<sub>mean</sub> at follow-up</b> | <b>TBR<sub>max</sub> at baseline</b> | <b>TBR<sub>max</sub> at follow-up</b> | <b>MTV at baseline</b> | <b>MTV at follow-up</b> |
|---------------------------------|---------------------------------------|----------------------------------------|--------------------------------------|---------------------------------------|------------------------|-------------------------|
| <b>Threshold</b>                | 1.9                                   | 1.8                                    | 2.0                                  | 2.1                                   | 28.2 mL                | 15.1 mL                 |
| <b>Sensitivity</b>              | 79%                                   | 58%                                    | 84%                                  | 79%                                   | 90%                    | 79%                     |
| <b>Specificity</b>              | 67%                                   | 88%                                    | 78%                                  | 88%                                   | 67%                    | 88%                     |
| <b>AUC ± standard deviation</b> | 0.73 ± 0.09                           | 0.79 ± 0.08                            | 0.86 ± 0.07                          | 0.85 ± 0.07                           | 0.81 ± 0.07            | 0.85 ± 0.07             |
| <b>P-value</b>                  | 0.016                                 | 0.004                                  | < 0.001                              | 0.001                                 | 0.001                  | < 0.001                 |

**AUC** = area under the curve; **MTV** = metabolic tumor volume; **PFS** = progression-free survival; **TBR<sub>max</sub>**, **TBR<sub>mean</sub>** = maximum and mean tumor-to-brain ratio

**Supplemental Table 2:** Diagnostic performance of absolute values of <sup>18</sup>F-FET PET parameters for predicting a OS of 15 months or more

|                                 | <b>TBR<sub>max</sub> at baseline</b> | <b>TBR<sub>max</sub> at follow-up</b> | <b>MTV at baseline</b> | <b>MTV at follow-up</b> |
|---------------------------------|--------------------------------------|---------------------------------------|------------------------|-------------------------|
| <b>Threshold</b>                | 1.9                                  | 1.9                                   | 13.8 mL                | 22.8 mL                 |
| <b>Sensitivity</b>              | 64%                                  | 64%                                   | 71%                    | 86%                     |
| <b>Specificity</b>              | 79%                                  | 88%                                   | 74%                    | 63%                     |
| <b>AUC ± standard deviation</b> | 0.75 ± 0.09                          | 0.77 ± 0.09                           | 0.76 ± 0.08            | 0.80 ± 0.08             |
| <b>P-value</b>                  | 0.016                                | 0.012                                 | 0.013                  | 0.006                   |

**AUC** = Area under the curve; **MTV** = metabolic tumor volume; **OS** = overall survival; **TBR<sub>max</sub>**, **TBR<sub>mean</sub>** = maximum and mean tumor-to-brain ratio
